# Supplementary material for: Transcriptome analysis of neo-tetraploid rice reveals specific differential gene expressions associated with fertility and heterosis
Source: PubMed Central journal article supplement (PMC5223177; doi:10.1038/srep40139), 2017-01-10
Supplement: srep40139-s1.pdf [file srep40139-s1.pdf]

## Supplementary information

### **Transcriptome analysis of Neo-tetraploid rice reveals specific differential gene expressions associated with fertility and heterosis**

Haibin Guo<sup>†</sup>, Mendrikahy Jean Nestor<sup>†</sup>, Lei Xie<sup>†</sup>, Junfeng Deng, Zijun Lu, Jinwen Wu, Xiang Li, Muhammad Qasim Shahid<sup>\*</sup>, Xiangdong Liu<sup>\*</sup>

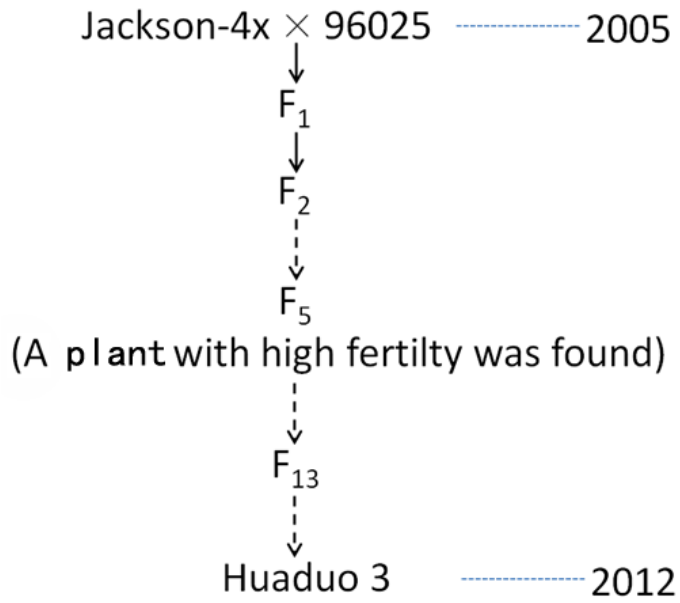

**Fig. S1. Breeding process of Huaduo 3**

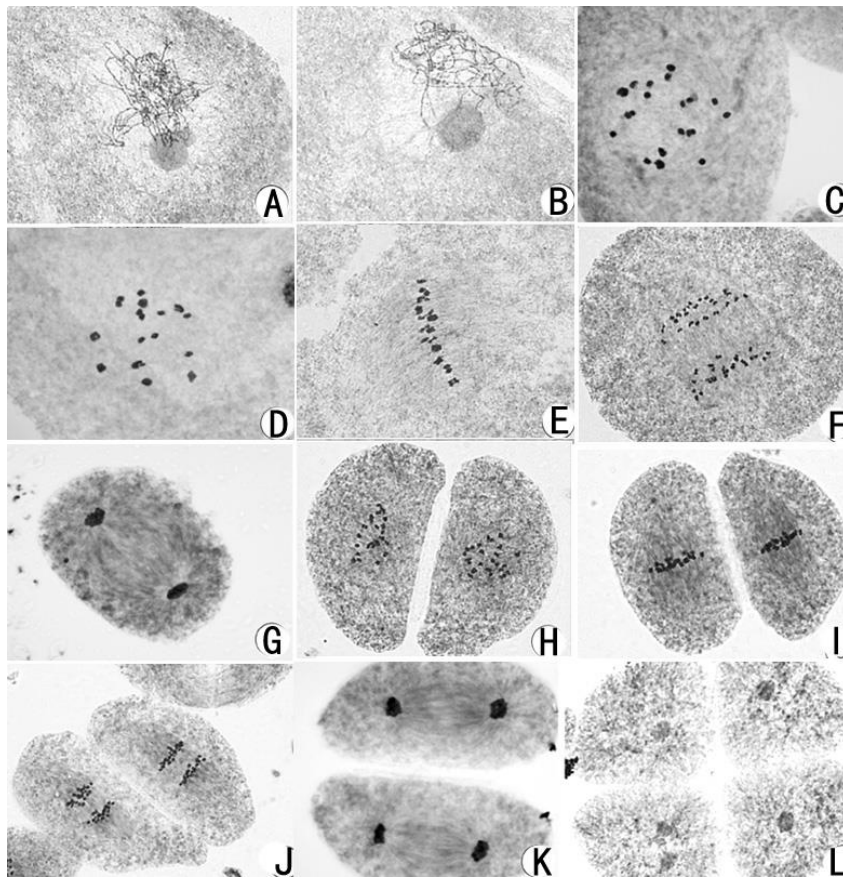

**Fig. S2. Chromosome behavior during pollen mother cell meiosis in Huaduo 3.**  
 (A) zygotene; (B) pachytene; (C, D) diakinesis; (E) metaphase I; (F) anaphase I;  
 (G) telophase I; (H) prophase II; (I) metaphase II; (J) anaphase II; (K) telophase  
 II; (L) the tetrad stage.

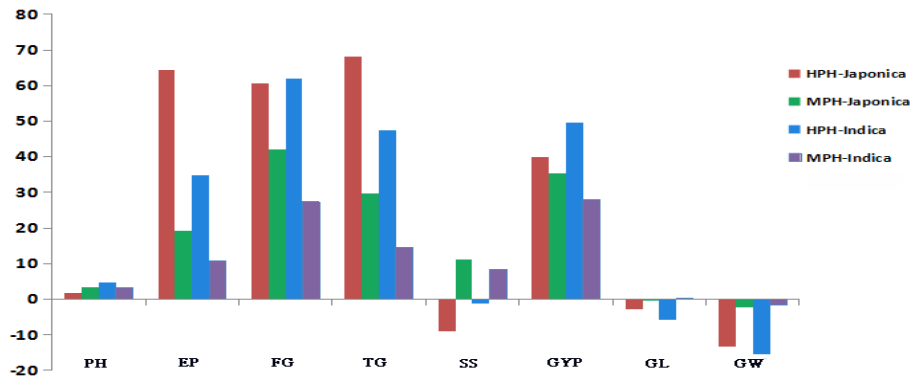

**Fig. S3. Heterosis analysis of the hybrids generated by crossing Huaduo 3 (H3) with other autotetraploid rice lines.**

HPH-*japonica*: High-parent heterosis of H3 and *japonica*; MPH-*japonica*: Mid-parent heterosis of H3 and *japonica*; HPH-*indica*: High-parent heterosis of H3 and *indica*; MPH-*indica*: Mid-parent heterosis of H3 and *indica*

PH: Plant height; EP: Effective number of panicles per plant; FG: Filled grains per plant; TG: Total grains per plant; SS: Seed setting; GYP: Grain yield per plant; GL: Grain length (10-Grains); GW: Grain width (10-Grains)

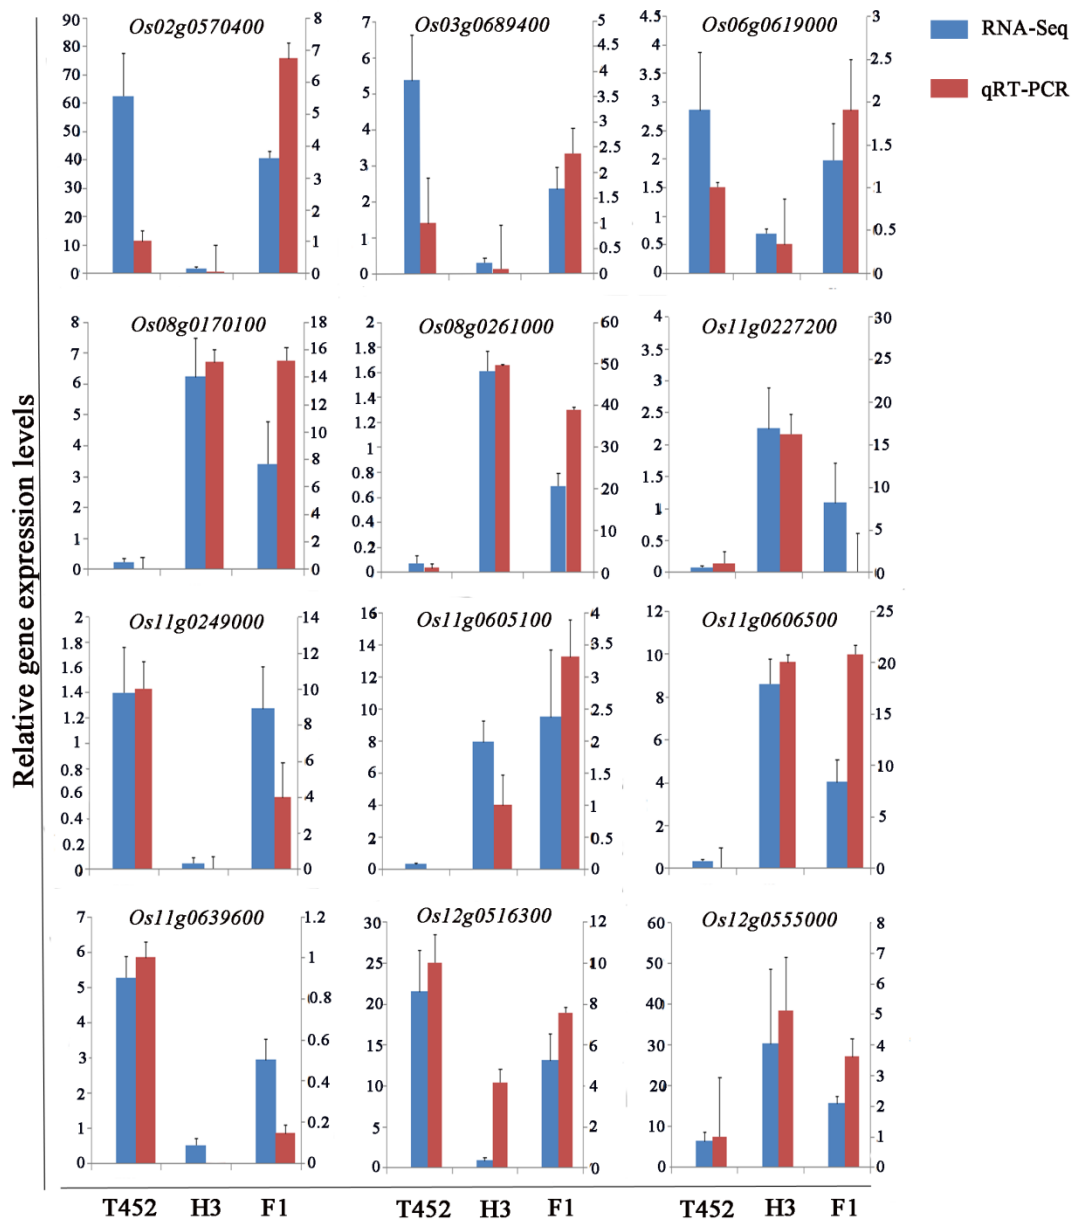

**Fig. S4. qRT-PCR validation for the quality of transcriptomic data.**

The blue columns represent the expression level of the transcript (y-axis), and the red columns represent the relative gene expression levels by using qRT-PCR from three independent replicates (y-axis).

H3: Huaduo 3; T452: Huajingxian 74-4x; F<sub>1</sub>: (Huajingxian 74-4x × Huaduo 3)

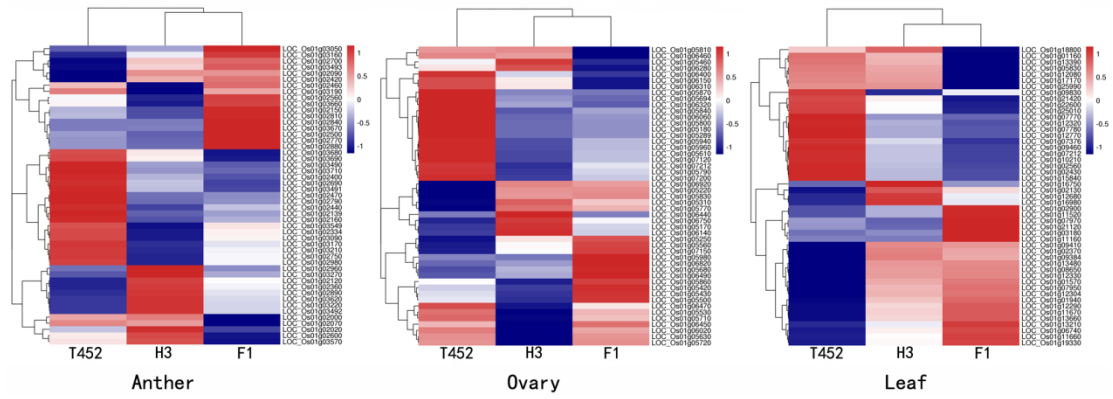

**Fig. S5. Clustering of differential gene expressions (DGEs) of anther, ovary and leaf in F<sub>1</sub> compared to its parents.**

H3: Huaduo 3; T452: Huajingxian 74-4x; F<sub>1</sub>: (Huajingxian 74-4x × Huaduo 3)

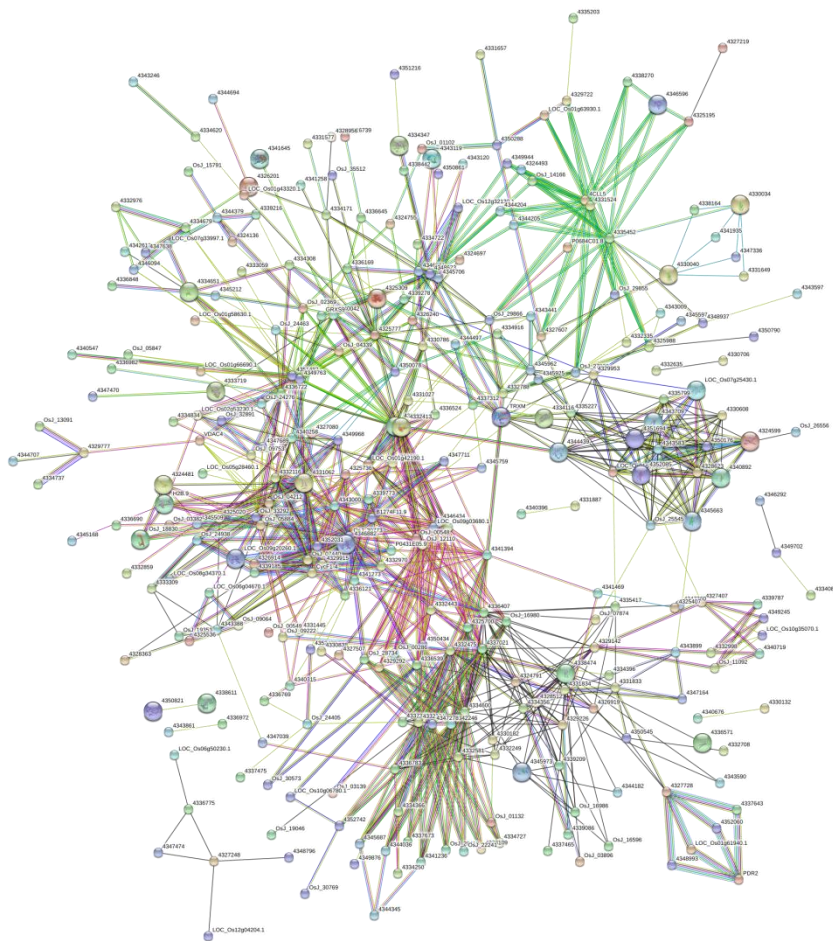

**Fig. S6a. Predicted protein-protein interaction network of differentially expressed genes uniquely belonging to F<sub>1</sub> compared to its parents (DEGFu-sp) in anther.**

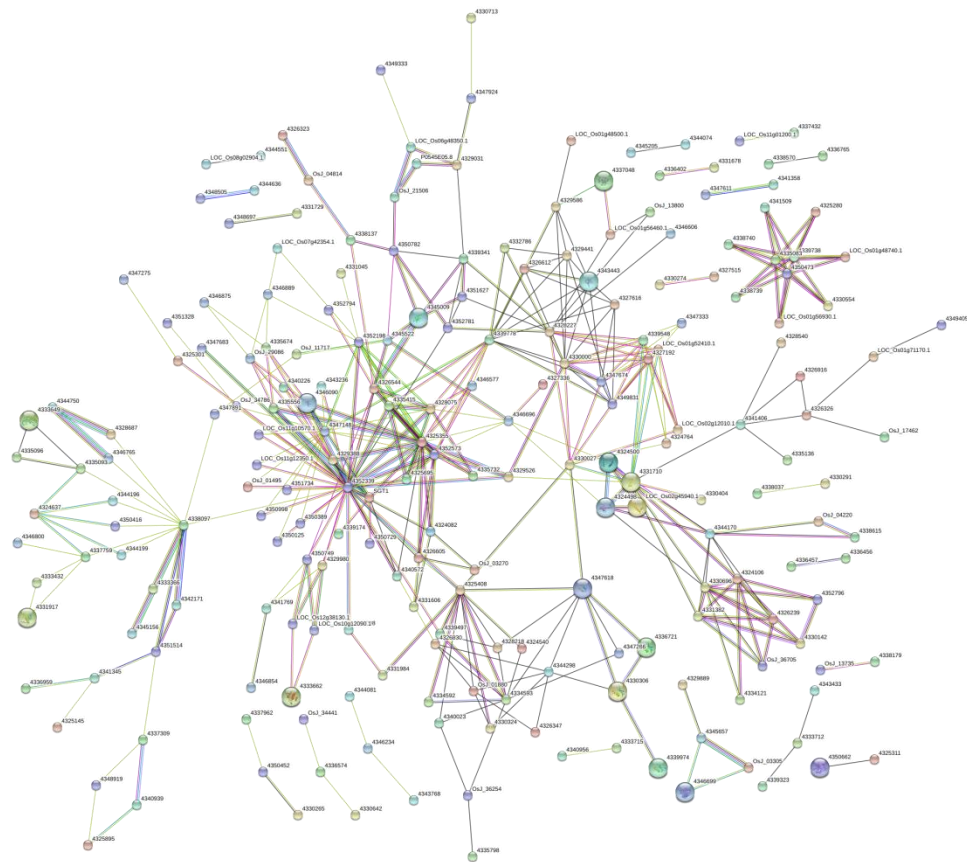

**Fig. S6b. Predicted protein-protein interaction network of differentially expressed genes uniquely belonging to F<sub>1</sub> compared to its parents (DEGFu-sp) in ovary.**

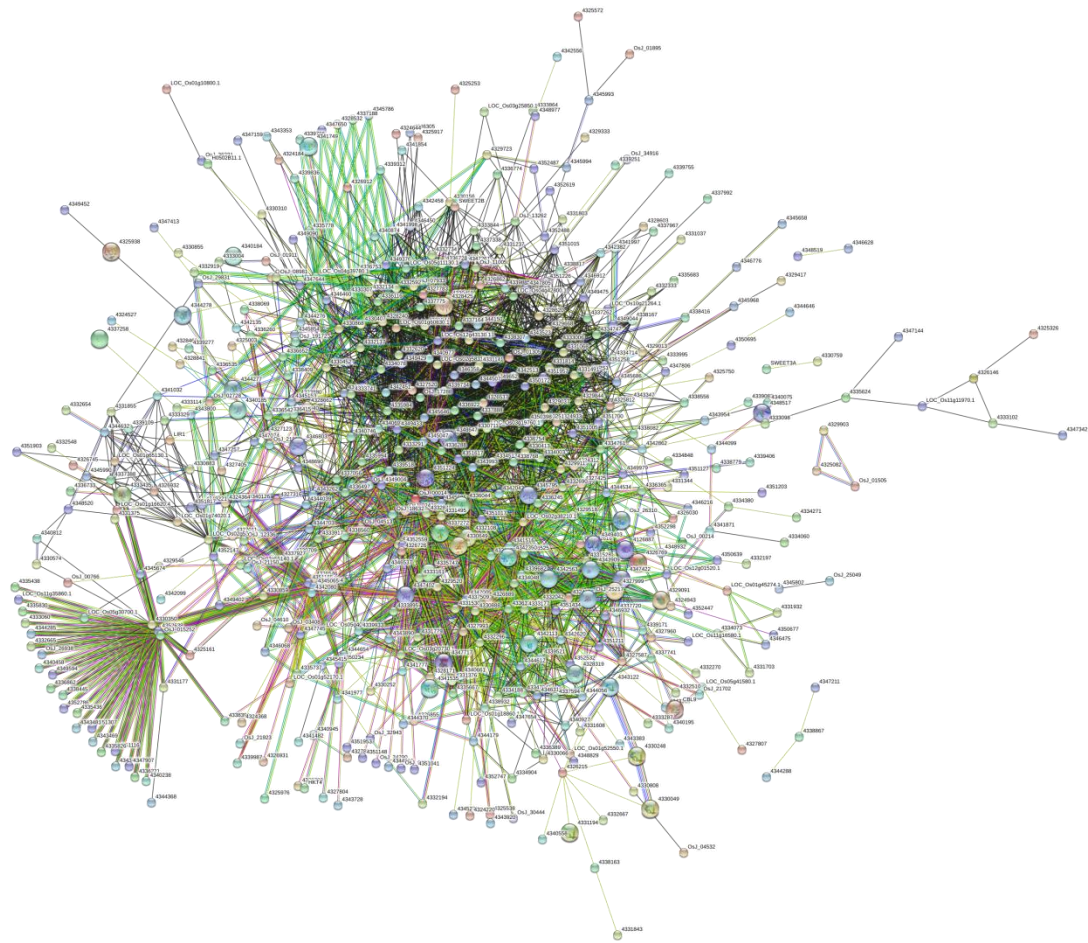

**Fig. S6c. Predicted protein-protein interaction network of differentially expressed genes uniquely belonging to F<sub>1</sub> compared to its parents (DEGFu-sp) in leaf.**







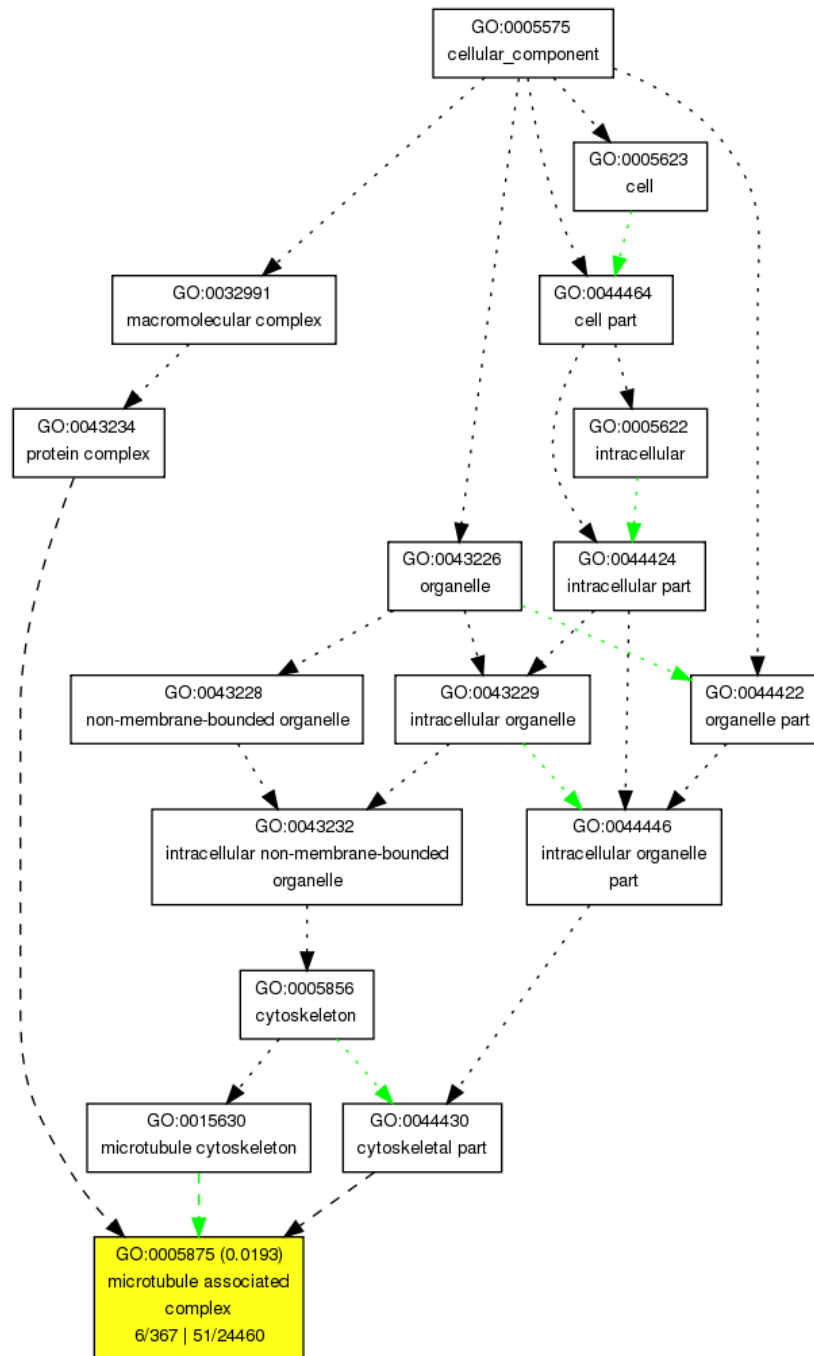

**Fig. S8b.** GO analysis of differentially expressed genes uniquely belonging to  $F_1$  compared to parents (DEGFu-sp) of the cellular component category in ovary.

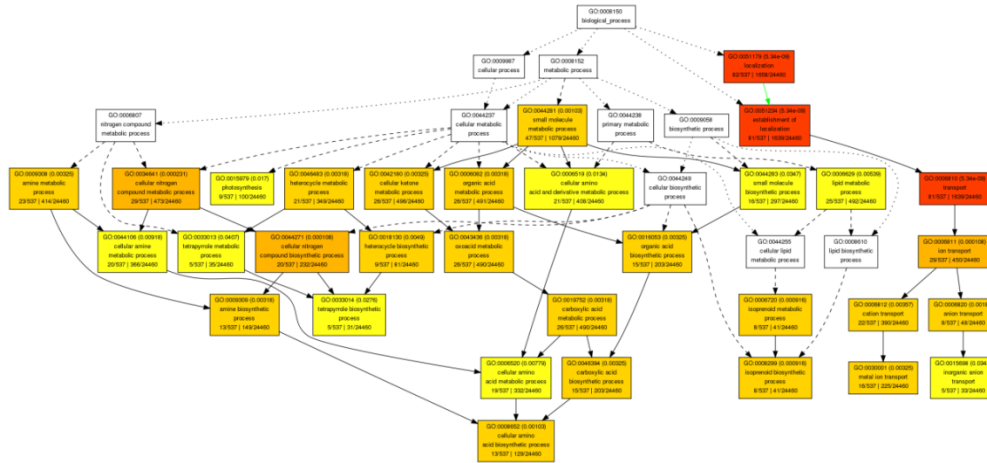

**Fig. S9. GO analysis of differentially expressed genes uniquely belonging to F<sub>1</sub> compared to parents (DEGFu-sp) of the Biological process category in leaf.**

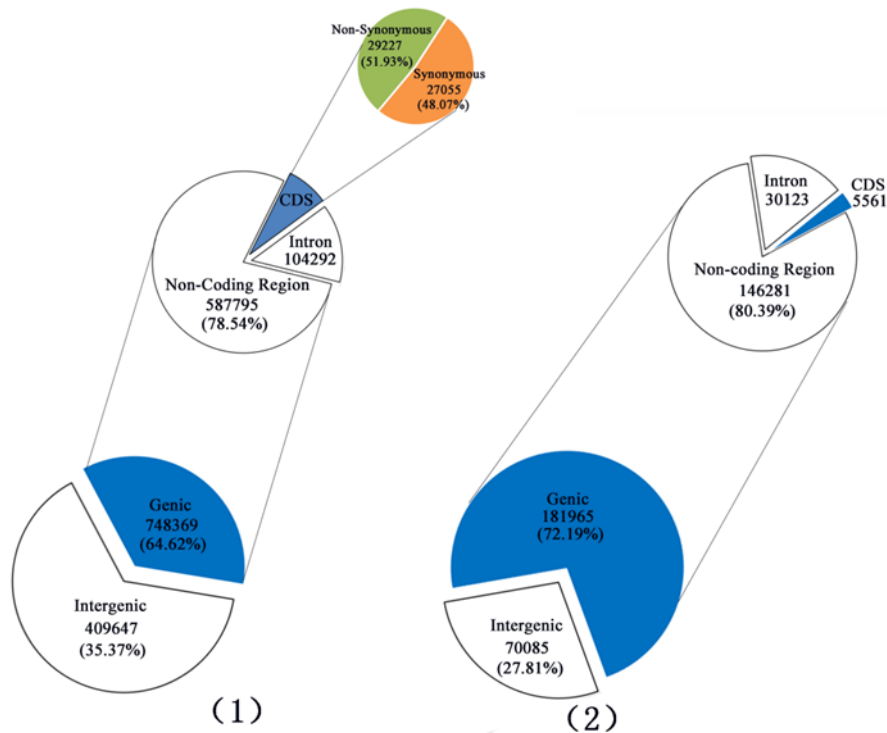

**Fig. S10. SNP and Indel variations between Huajingxian 74-4x (T452) and Huaduo 3 (H3).**

(1) SNP; (2) Indel; CDS (coding sequences)

**Table S1.** Agronomic traits of Huaduo 3, autotetraploid rice parents and their hybrids.

| Name                  | PH (cm) | EP   | FG     | TG     | SS (%) | GYP(g) | GL(cm) | GW(cm) |
|-----------------------|---------|------|--------|--------|--------|--------|--------|--------|
| <i>Indica</i> lines   | 110.95  | 4.95 | 218.85 | 500.47 | 41.38  | 6.65   | 10.17  | 3.33   |
| <i>Japonica</i> lines | 104.94  | 3.94 | 92.64  | 277.04 | 25.97  | 2.83   | 8.99   | 3.79   |
| Huaduo 3              | 121.67  | 4.00 | 412.00 | 493.00 | 83.93  | 16.03  | 8.90   | 4.00   |
| Jl                    | 128.40  | 6.23 | 351.20 | 635.12 | 54.61  | 12.59  | 9.73   | 3.60   |
| HIH                   | 131.65  | 6.51 | 686.46 | 813.54 | 83.07  | 24.49  | 9.54   | 3.40   |
| HJH                   | 128.25  | 6.92 | 661.73 | 828.84 | 76.45  | 22.42  | 8.92   | 3.52   |

Jl indicates hybrids developed by crossing *japonica* with *indica* autotetraploid rice lines.

HIH indicates hybrids developed by crossing Huaduo 3 with *indica* autotetraploid rice lines.

HJH indicates hybrids developed by crossing Huaduo 3 with *japonica* autotetraploid rice lines.

PH: Plant height; EP: Effective number of panicles per plant; FG: Filled grains per plant; TG: Total grains per plant; SS: Seed setting; GYP: Grain yield per Plant; GL: Grain length (10-grains); GW: Grain width (10-grains)

**Table S2.** Heterosis analysis of hybrids generated by the crossing of Huaduo 3 and *indica* autotetraploid rice lines.

| Main traits | High parent heterosis |                      |                 |    |    | Mid parent heterosis |                      |                 |    |    |
|-------------|-----------------------|----------------------|-----------------|----|----|----------------------|----------------------|-----------------|----|----|
|             | Average value         | Variable coefficient | Variation range | +  | -  | Average value        | Variable coefficient | Variation range | +  | -  |
| PH          | 4.71                  | 1.74                 | -12.88~27.82    | 19 | 7  | 3.24                 | 0.83                 | -0.43~10.18     | 25 | 1  |
| EP          | 34.90                 | 1.35                 | -66.67~137.50   | 22 | 4  | 10.66                | 1.23                 | -11.84~38.41    | 23 | 3  |
| FG          | 61.95                 | 1.18                 | -65.96~240.53   | 21 | 5  | 27.30                | 0.89                 | -9.76~91.77     | 25 | 1  |
| TG          | 47.38                 | 1.41                 | -53.19~212.07   | 20 | 4  | 14.51                | 1.14                 | -8.79~54.60     | 24 | 2  |
| SS          | -1.33                 | -7.83                | -44.10~9.08     | 15 | 11 | 8.40                 | 0.68                 | -0.41~21.11     | 25 | 1  |
| GYP         | 49.51                 | 1.31                 | -55.65~216.41   | 20 | 6  | 27.87                | 0.93                 | -4.34~94.45     | 25 | 1  |
| GL          | -5.80                 | -1.37                | -22.05~6.62     | 7  | 19 | 0.02                 | 72.63                | -2.70~2.50      | 15 | 11 |
| GW          | -15.35                | -0.35                | -24.38~-3.19    | 0  | 26 | -1.70                | -0.79                | -5.05~0.19      | 1  | 25 |

**Table S3.** Heterosis analysis of hybrids generated by the crossing of Huaduo 3 and *japonica* autotetraploid rice lines.

| Main traits | High parent heterosis |                      |                 |    |    | Mid parent heterosis |                      |                 |    |    |
|-------------|-----------------------|----------------------|-----------------|----|----|----------------------|----------------------|-----------------|----|----|
|             | Average value         | Variable coefficient | Variation range | +  | -  | Average value        | Variable coefficient | Variation range | +  | -  |
| PH          | 1.84                  | 8.09                 | -34.11~32.99    | 8  | 6  | 3.29                 | 1.18                 | -6.81~9.33      | 12 | 2  |
| EP          | 64.46                 | 0.76                 | 0~182.35        | 14 | 0  | 19.10                | 0.69                 | 4.43~47.73      | 14 | 0  |
| FG          | 60.61                 | 0.86                 | -3.40~13.32     | 13 | 1  | 42.03                | 0.56                 | 20.49~92.80     | 14 | 0  |
| TG          | 68.12                 | 0.68                 | 10.75~136.87    | 14 | 0  | 29.75                | 0.59                 | 8.15~66.04      | 14 | 0  |
| SS          | -8.91                 | -1.76                | -50.50~8.89     | 5  | 9  | 11.07                | 0.75                 | -1.67~22.18     | 11 | 3  |
| GYP         | 39.88                 | 1.39                 | -23.65~142.00   | 10 | 4  | 35.31                | 0.65                 | 3.89~82.82      | 14 | 0  |
| GL          | -2.77                 | -3.47                | -33.99~8.99     | 5  | 9  | -0.08                | -31.75               | -8.47~2.29      | 8  | 6  |
| GW          | -13.25                | -0.77                | -35.95~-1.54    | 0  | 14 | -2.24                | -0.99                | -8.43~-0.58     | 0  | 14 |

PH: Plant height; EP: Effective number of panicles per plant; FG: Filled grains per plant; TG: Total grains per plant; SS: Seed setting; GYP: Grain yield per plant; GL: Grain length (10-grains); GW: Grain width (10-grains)

+: the number of hybrids with positive heterosis; -: the number of hybrids with negative heterosis

**Supplementary Table S4. The list of differentially expressed genes that uniquely associated with F<sub>1</sub> compared to parents and specific (DEGFu-sp) to anther, ovary and leaf.**

(Please see the supplementary Excel file).

**Supplementary Table S5. Differentially expressed genes uniquely belonging to F<sub>1</sub> compared to T452 (DEGFu-sp) in anther**

(Please see the supplementary Excel file).

**Supplementary Table S6. Identification of miRNAs associated with DEGFu-sp to anther and their target genes.**

(Please see the supplementary Excel file).



**Supplementary Table S7. DEGFu-nonadditive genes in anther, ovary and leaf**  
(Please see the supplementary Excel file).

**Table S8.** SNPs and Indels mapped to reference genome and specific to two parents.

| Name              | SNPs    | Specific SNPs | Indels | Specific Indels |
|-------------------|---------|---------------|--------|-----------------|
| Huajingxian 74-4x | 1976579 | 1192412       | 415252 | 248194          |
| Huaduo 3          | 1158627 | 374460        | 251254 | 84196           |
| Total             | 2351039 | 1566872       | 499448 | 332390          |

**Table S9.** SNP and Indel variations between Huajingxian 74-4x (T452) and Huaduo 3 (H3).

| Type  | Total   | Non-polymorphic loci | Polymorphic loci | Polymorphism rate (%) |
|-------|---------|----------------------|------------------|-----------------------|
| SNP   | 1704411 | 566368               | 1138043          | 66.77                 |
| Indel | 360400  | 108227               | 252173           | 69.97                 |

**Table S10.** Different loci statistics of SNPs and Indels variations between Huajingxian 74-4x and Huaduo 3.

| Class                 | SNPs   |          | Class                   | Indels |          |
|-----------------------|--------|----------|-------------------------|--------|----------|
|                       | No     | Rate (%) |                         | No     | Rate (%) |
| INTERGENIC            | 409647 | 35.3717  | INTERGENIC              | 70085  | 27.7843  |
| UPSTREAM              | 311044 | 26.8577  | UPSTREAM                | 75667  | 29.9972  |
| DOWNSTREAM            | 241003 | 20.8098  | DOWNSTREAM              | 58947  | 23.3688  |
| UTR_5_PRIME           | 9401   | 0.8117   | UTR_5_PRIME             | 4622   | 1.8323   |
| UTR_3_PRIME           | 21372  | 1.8454   | UTR_3_PRIME             | 6344   | 2.515    |
| INTRAGENIC            | 104    | 0.009    | INTRAGENIC              | 197    | 0.0781   |
| INTRON                | 104292 | 9.0053   | INTRON                  | 30123  | 11.9419  |
| SPLICE_SITE_ACCEPTOR  | 86     | 0.0074   | SPLICE_SITE_ACCEPTOR    | 55     | 0.0218   |
| SPLICE_SITE_DONOR     | 105    | 0.0091   | SPLICE_SITE_DONOR       | 82     | 0.0325   |
| SPLICE_SITE_REGION    | 2158   | 0.1863   | SPLICE_SITE_REGION      | 564    | 0.2236   |
| START_GAINED          | 1984   | 0.1713   | FRAME_SHIFT             | 2001   | 0.7933   |
| START_LOST            | 89     | 0.0077   | START_LOST              | 37     | 0.0147   |
| STOP_GAINED           | 405    | 0.035    | STOP_GAINED             | 41     | 0.0163   |
| STOP_LOST             | 148    | 0.0128   | STOP_LOST               | 42     | 0.0167   |
| SYNONYMOUS_CODING     | 27006  | 2.3319   | CODON_CHANGE(INSERTION) | 337    | 0.1336   |
| NON_SYNONYMOUS_CODING | 29219  | 2.523    | CODON_CHANGE(DELETION)  | 611    | 0.2422   |
| SYNONYMOUS_STOP       | 49     | 0.0042   | CODON_INSERTION         | 1372   | 0.5439   |
| NON_SYNONYMOUS_START  | 8      | 0.0007   | CODON_DELETION          | 1120   | 0.444    |

**Table S11.** Names and the types of parents used to prepare autotetraploid rice hybrids.

| Code No. | <i>Indica</i> autotetraploid parents |             | Code No. | <i>Japonica</i> autotetraploid parents |        |
|----------|--------------------------------------|-------------|----------|----------------------------------------|--------|
|          | Name                                 | Source      |          | Name                                   | Source |
| T41      | Aijiaonante-4x                       | Lab*        | T47      | Liaojing 944-4x                        | Lab    |
| T44      | 96025-4x                             | ICS,CAAS**  | T48      | Yanjing 48-4x                          | Lab    |
| T412     | Dadanbai86-4x                        | Lab         | T413     | J455-4x                                | Lab    |
| T416     | Yuhei 1-4x                           | Lab         | T415     | Nanhaizhaoyinzhan-4x                   | Lab    |
| T417     | Xichuan-4x                           | Lab         | T422     | J422-4x                                | Lab    |
| T419     | Yuexiangzhan-4x                      | Lab         | T424     | Shennong 15-4x                         | Lab    |
| T420     | Dayebai-4x                           | Lab         | T431     | Taichung 65-4x                         | Lab    |
| T421     | Guinongzhan-4x                       | Lab         | T432     | E2-4x                                  | Lab    |
| T428     | Linglun-4x                           | Lab         | T433     | E4-4x                                  | Lab    |
| T442-1   | 4001-1-4x                            | Lab         | T434     | E5-4x                                  | Lab    |
| T443     | CypressPB-6-4x                       | SCBG,CAS*** | T435     | E24-4x                                 | Lab    |
| T444     | Gulfmont-4x                          | SCBG,CAS    | T437     | E45-4x                                 | Lab    |
| T445     | Luxiang-97-4x                        | SCBG,CAS    | T438     | E245-4x                                | Lab    |
| T453     | PII-6-4x                             | Lab         | T450     | 02428-4x                               | Lab    |
| T447     | IR36-4x                              | Lab         |          |                                        |        |
| T448     | 8821-4x                              | Lab         |          |                                        |        |
| T451     | Dalino-4x                            | Lab         |          |                                        |        |
| T452     | Huajingxian 74-4x                    | Lab         |          |                                        |        |
| T456     | M12-4x                               | Lab         |          |                                        |        |
| T461     | Wuxienuo-4x                          | ICS,CAAS    |          |                                        |        |
| T463     | Nanjing 11-4x                        | ICS,CAAS    |          |                                        |        |
| T465     | Nantehao-4x                          | ICS,CAAS    |          |                                        |        |
| T467     | Peiai64-4x                           | ICS,CAAS    |          |                                        |        |
| T469     | Huayinzhan-4x                        | Lab         |          |                                        |        |
| T473     | Huahui305-4x                         | Lab         |          |                                        |        |
| T479     | N39s-4x                              | Lab         |          |                                        |        |

Lab\*: State Key Laboratory for Conservation and Utilization of Subtropical Agro-bioresources, South China Agricultural University

ICS,CAAS\*\*: Institute of Crop Sciences, Chinese Academy of Agricultural Sciences

SCBG,CAS\*\*\*: South China Botanical Garden, Chinese Academy of Sciences

**Table S12.** Autotetraploid rice hybrids generated in the present study.

| No. | Crossing parents | No. | Crossing parents | No. | Crossing parents |
|-----|------------------|-----|------------------|-----|------------------|
| 1   | T437×T41*        | 12  | T435×T413        | 23  | T433×T453        |
| 2   | T424×T419        | 13  | T438×T413        | 24  | T434×T453        |
| 3   | T424×T420        | 14  | T432×T416        | 25  | T435×T453        |
| 4   | T424×T442        | 15  | T433×T416        | 26  | T437×T453        |
| 5   | T424×T444        | 16  | T434×T416        | 27  | T438×T453        |
| 6   | T424×T445        | 17  | T435×T416        | 28  | T434×T455        |
| 7   | T424×T447        | 18  | T433×T443        | 29  | T435×T455        |
| 8   | T424×T448        | 19  | T434×T443        | 30  | T437×T455        |
| 9   | T424×T451        | 20  | T431×T452        | 31  | T434×T456        |
| 10  | T424× T463       | 21  | T432×T452        | 32  | T434×T456        |
| 11  | T434×T413        | 22  | T434×T452        | 33  | T433×T469        |

\* : See Table S11 for the names of autotetraploid rice lines

**Table S13.** Hybrids developed by crossing Huaduo 3 with different types of autotetraploid rice lines

| No. | HIH*          | No. | HIH      | No. | HJH**    |
|-----|---------------|-----|----------|-----|----------|
| 1   | H3***×T41**** | 15  | H3×T447  | 1   | H3 ×T47  |
| 2   | H3×T44        | 16  | H3×T448  | 2   | H3 ×T48  |
| 3   | H3×T412       | 17  | H3×T451  | 3   | H3×T413  |
| 4   | H3×T416       | 18  | H3×T452  | 4   | H3×T415  |
| 5   | H3×T417       | 19  | H3×T456  | 5   | H3×T422  |
| 6   | H3×T419       | 20  | H3×T461  | 6   | H3×T424  |
| 7   | H3×T420       | 21  | H3×T463  | 7   | T431 ×H3 |
| 8   | H3×T421       | 22  | H3×T465  | 8   | T432×H3  |
| 9   | T428×H3       | 23  | H3×T467  | 9   | T433 ×H3 |
| 10  | H3×T442-1     | 24  | H3×T469  | 10  | T434 ×H3 |
| 11  | H3×T443       | 25  | H3×T473  | 11  | T435 ×H3 |
| 12  | H3×T444       | 26  | T479 ×H3 | 12  | T437 ×H3 |
| 13  | H3×T445       |     |          | 13  | T438 ×H3 |
| 14  | H3×T453       |     |          | 14  | H3×T450  |

\* : HIH indicates hybrids developed by crossing Huaduo 3 with *indica* autotetraploid rice lines.

\*\* : HJH indicates hybrids developed by crossing Huaduo 3 with *japonica* autotetraploid rice lines.

\*\*\* : H3 indicates Huaduo 3. \*\*\*\* : See Table 11 for the names of autotetraploid rice lines.

**Table S14.** List of primers used for qRT-PCR

| <b>No.</b> | <b>Gene Symbol</b>    | <b>Primer(pair)</b>                                | <b>Amplicon length (bp)</b> |
|------------|-----------------------|----------------------------------------------------|-----------------------------|
| 1          | <i>LOC_Os02g36140</i> | CAACAGACTCGACCAGCTACATT<br>CGATAACAGCCGTCAACCAA    | 140                         |
| 2          | <i>LOC_Os03g48320</i> | CGTGAGCCTTGAATCCGTAG<br>GCATCCAAGTCCTCCCAAAC       | 186                         |
| 3          | <i>LOC_Os06g41480</i> | CTTGAGAATTGCATGGGTTGG<br>GCCCTTCATTTACCGTTCC       | 135                         |
| 4          | <i>LOC_Os08g07330</i> | AGCTCATCAACGGAATCAAGG<br>AGAGTCATCACGAGAAAGTGGC    | 212                         |
| 5          | <i>LOC_Os08g16120</i> | GTTGCTGTTTGTGGTATGGGTG<br>TCGTAGTTTACTTCGCTGCTGTC  | 182                         |
| 6          | <i>LOC_Os11g12000</i> | GAGTATGAGCGGGAGAAGAACA<br>CAAGTCACGAGGGTCCAAATC    | 177                         |
| 7          | <i>LOC_Os11g14380</i> | TTGATTCCAAGGATGCGAAGG<br>CGAACACTAGGCCCAGATGC      | 157                         |
| 8          | <i>LOC_Os11g39190</i> | ACGGTACATCAATAGTCCCAACG<br>TTCTGCCTGAACAACATCCTCT  | 193                         |
| 9          | <i>LOC_Os11g39320</i> | AGCAGCAATGGGAAGGTGA<br>CAAAGATCGGACATGCGACA        | 216                         |
| 10         | <i>LOC_Os11g42040</i> | TTGTATTTGACGATGTATGGGTGC<br>TCCAGCGAACTAGATGGTGTTT | 172                         |
| 11         | <i>LOC_Os12g33160</i> | GCAATGAACACCCTCCTCCC<br>TGGCATCCTCGATGTCGTAA       | 220                         |
| 12         | <i>LOC_Os12g36830</i> | GCCATGCCCAAGGTTTGT<br>CCATCATCCACAGCAGGGTT         | 107                         |
| 13         | <i>Ubiquitin</i>      | CAAGATGATCTGCCGCAAATGC<br>TTTAACCAGTCCATGAACCCG    | 103                         |
